# Supplementary material for: Application Effect Analysis of Three Methods of Heating and Humidification for Weaning Patients in ICU
Source: Research Square preprint supplement (doi:10.21203/rs.3.rs-170217/v2), 2021-08-04
Supplement: Supplementary file 2 [file 5e41a631affeac234c21844d.xlsx]

## Sheet: Sheet1
	artificial nase	T-piece	T-piece+PEEP valve	P value
Total	58	52	56	p＜0.0001
Grade I	0 (0%)	24 (46.2%)	32 (57.1%)
Grade II	30 (51.7%)	28 (53.8%)	24 (42.9%)
Grade III	28 (48.3%)	0 (0%)	0 (0%)
