# Supplementary material for: Application Effect Analysis of Three Methods of Heating and Humidification for Weaning Patients in ICU
Source: Research Square preprint supplement (doi:10.21203/rs.3.rs-170217/v2), 2021-08-04
Supplement: Supplementary file 3 [file ccc5997b16c35697928b5962.xlsx]

## Sheet: Sheet1
	Artificial noses(n=58)	T-piece (n=52)	T-piece+PEEP Valve(n=56)		p
Age	（61.4±16.9）	（60.3±18.1）	（65.7±13.9）		0.8428
Gender	26/32	29/23	30/26		0.4716
Male	26	29	30
Female	32	23	26
ventilation time	8.4±6.37	8.3±6.12	8.2±6.67		0.9862
ICU length of stay	35.4±30.84	36.4±29.22	36.6±31.08		0.9749
VAP	11（35%）	9（29%）	11（35%）		0.9504
24h off	23(31%)	24(32%)	28(37%)		0.5326
72h off	20(30%)	25(37%)	22(33%)		0.342
suctioning frequecy/h	(0.89±0.16）	(0.88±0.19）	(0.84±0.12）		0.2113
Blood-tinged sputum	6(35%)	6(35%)	5(29%)		0.9045
sputum scab	12(31%)	14(36%)	13(33%)		0.7422
choking	18(35%)	17(33%)	17(33%)		0.0601
MAP	84.87±15.638	82.89±10.368	83.12±11.608		0.6702
R	25.62±5.736	24.64±5.438	23.56±4.235		0.1081
HR	（88.3±16.36）	(82.67±13.26）	（84.73±12.75）		0.1129
SPO2	（98.07±1.21）	（97.73±3.03）	（97.47±2.45）		0.0649
APECH2	(17.87±6.4)	(19±6.59)	(20±7.79)		0.2652
PH	（7.46±0.05）	（7.45±0.03）	（7.45±0.04）		0.3312
PaO2/FiO2	(223±130.05)	(202±112.92)	(220.07±44.85)		0.5197
PaCO2	（37.3±5.4）	（35.69±6.33）	（38.81±8.36）		0.0617
HCO3-	（26.32±5.35）	（24.63±10.17）	（24.92±7.53）		0.476
Lactic Acid	（1.41±0.27）	（1.27±0.47）	（1.48±0.87）		0.1769
