# Supplementary material for: Application Effect Analysis of Three Methods of Heating and Humidification for Weaning Patients in ICU
Source: Research Square preprint supplement (doi:10.21203/rs.3.rs-170217/v2), 2021-08-04
Supplement: Supplementary file 4 [file 1fa76e73a7dc1cecffcc0e89.xlsx]

## Sheet: Sheet1
	artificial noses	T-piece	T-piece+PEEP Valve	P
R	22.69±5.132	21.39±5.102	23.23±5.322	0.566
MAP	86.82±11.138	83.87±10.620	82.56±13.137	0.419
HR/min	(91.6±17.49）	(83.23±15.86）	(82.73±20.97）	0.578
SPO2	(98.2±2.24）	(96.6±3.11）	(99.53±0.99）	0.004
PaO2/FiO2 Ratio (P/F Ratio)	(242.33±136.54)	(211.73±110.93)	(311.27±105.32)	0.085
PH	(7.44±0.03）	(7.45±0.08）	(7.44±0.05）	0.899
PaCO2	(39.14±6.82）	(37.86±7.97）	(48.75±25.84）	0.152
HCO3	(26.79±3.65）	(26.35±5.04）	(27.99±2.39）	0.728
Lactic Acid	(1.04±0.38）	(1.13±0.9）	(0.89±0.32）	0.0976
suctioning frequecy/h	(0.79±0.17）	(0.58±0.15）	(0.37±0.08）	0.0001
Blood-tinged sputum	10（50%）	6（30%）	4（20%）	0.083
sputum scab	16（53%）	8（27%）	6（20%）	0.03
choking	12(50%)	6(25%)	6(25%)	0.007
